# Supplementary material for: New flow relaxation mechanism explains scour fields at the end of submarine channels
Source: PubMed Central journal article supplement (PMC6764982; doi:10.1038/s41467-019-12389-x), 2019-09-27
Supplement: 41467_2019_12389_MOESM1_ESM.pdf [file 41467_2019_12389_MOESM1_ESM.pdf]

Supplementary Information for

**New flow relaxation mechanism explains scour fields  
at the end of submarine channels**

by

Pohl et al.

## Supplementary Figures

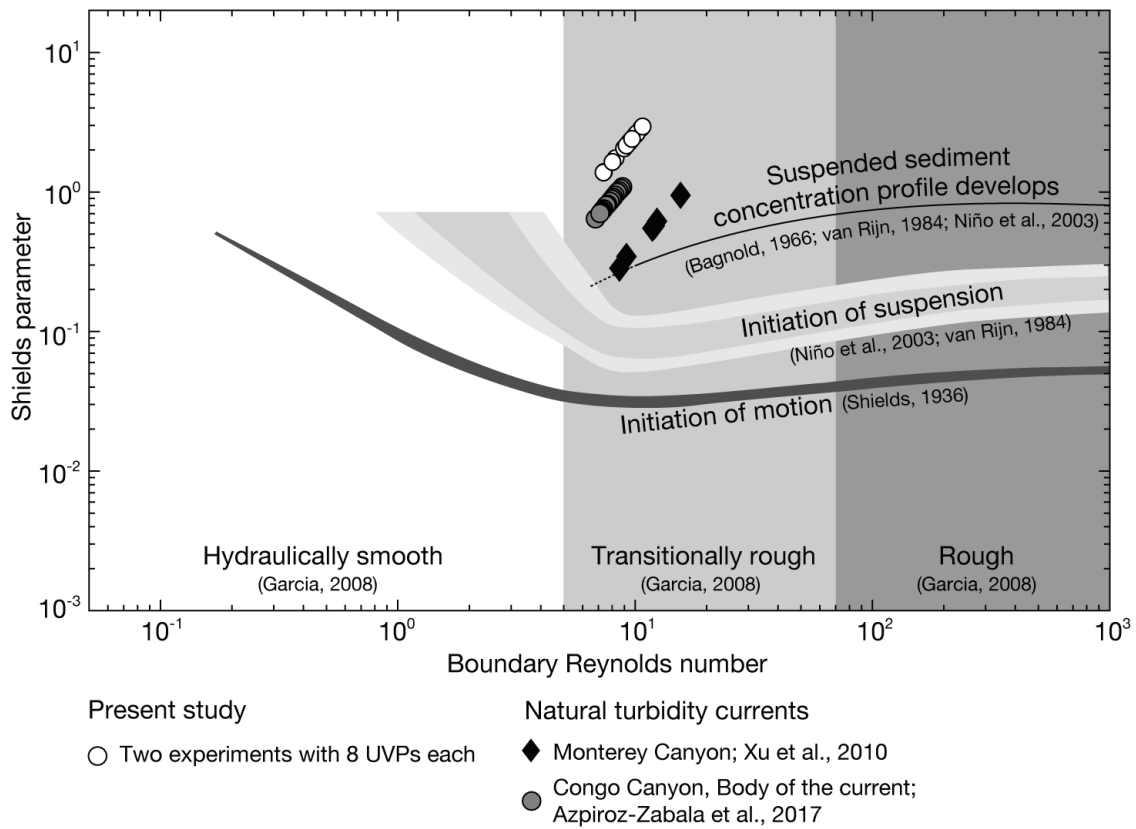

**Supplementary Figure 1. Shields mobility diagram.** Describes the dominant sediment transport mode for a given set of hydrodynamic conditions. Modified after <sup>1</sup> and <sup>2</sup>. Natural flows were monitored in the Monterey Canyon <sup>3</sup>, and the Congo Canyon <sup>4</sup>. For calculation of the Congo Canyon, the body of the current and a grain size of 200  $\mu\text{m}$  was used. Regime boundaries after: <sup>1,5-8</sup>

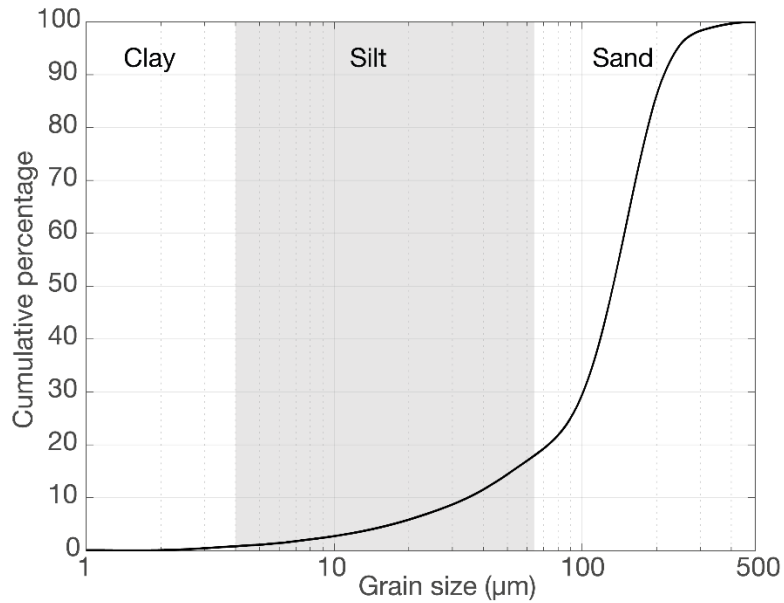

**Supplementary Figure 2. Cumulative grain-size distribution.** Sand of identical grain size was used for the floor of the flume tank and for the suspended sediment of the turbidity current. Grain size was measured with a laser particle sizer (Malvern Mastersizer 2000).

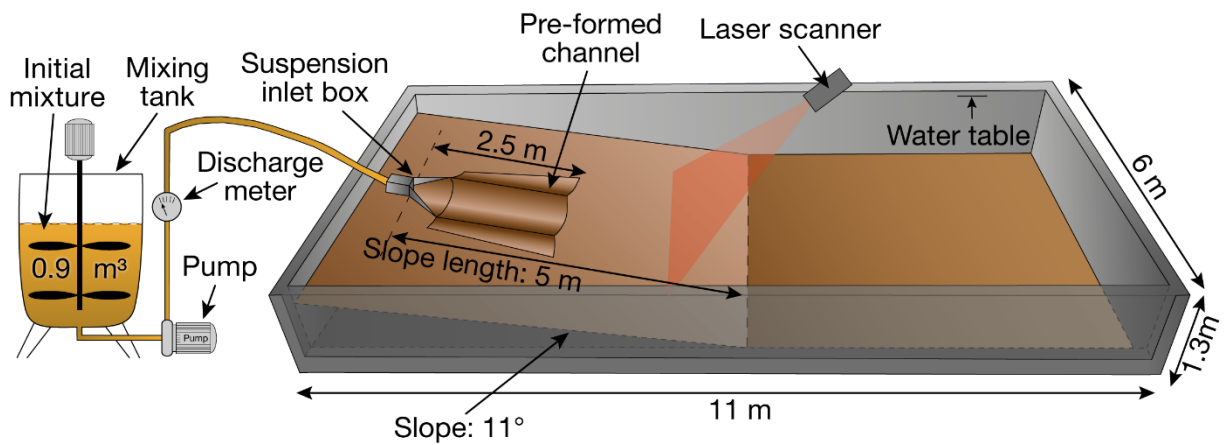

**Supplementary Figure 3. Schematic drawing of the experiment setup.** Note that the length of the reference (no loss of confinement) experiment extended 5 m further downslope.

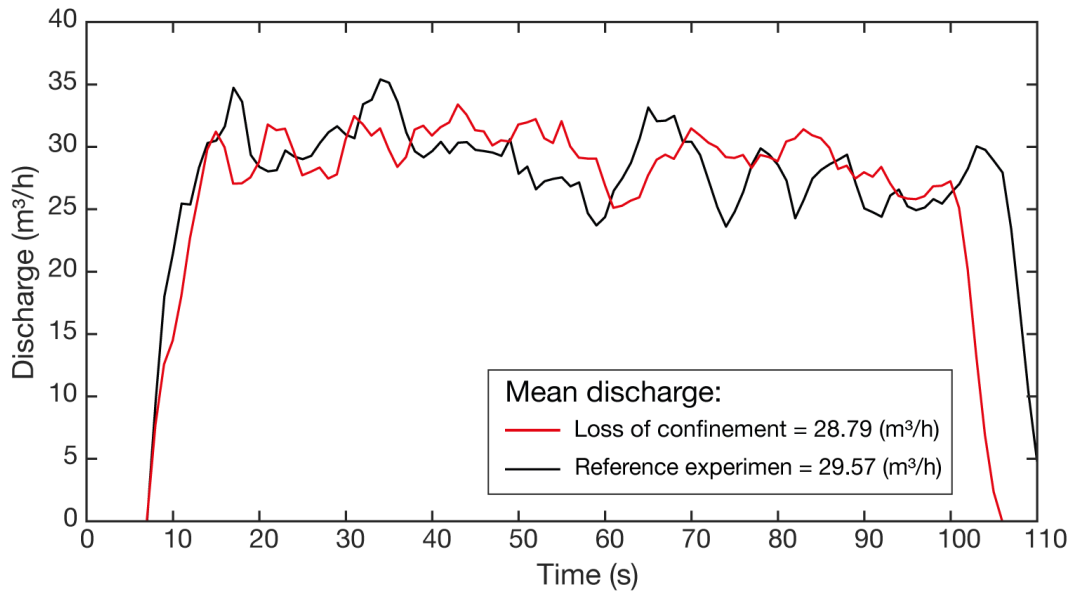

**Supplementary Figure 4. Discharge measurements of the two experiments.** The discharge was measured with an electromagnetic flow-meter (Krohne Optiflux 2300). The mean discharge was calculated by averaging over the time interval between 15 to 95 s.

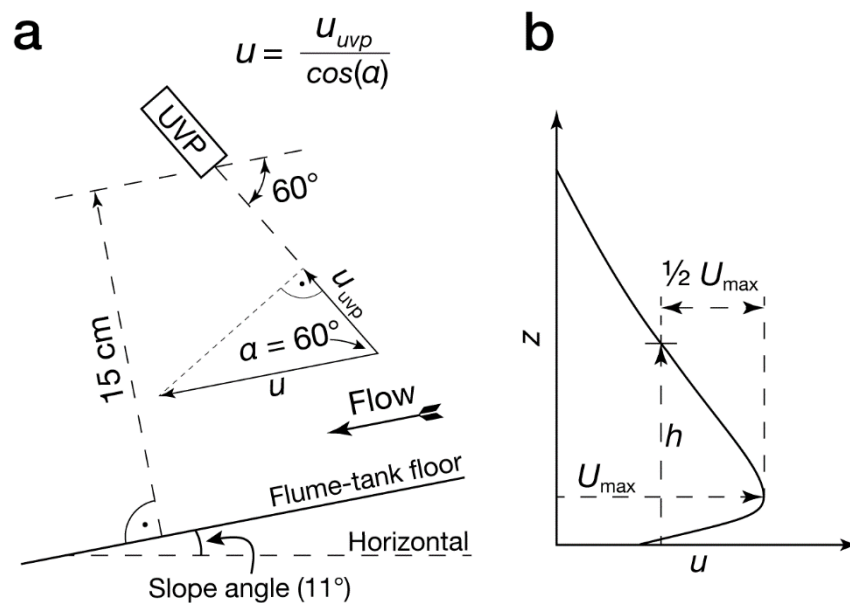

**Supplementary Figure 5. UVP orientation and parameterization of the velocity profile.**

**a,b,** (a) The orientation of the UVP and the trigonometric calculation to calculate bed-parallel velocities.  $u_{UVP}$  is the velocity component directed toward the UVP and  $u$  is the bed parallel velocity in downflow direction. Not to scale. (b) Sketch of a velocity profile illustrating the analysis of the time-averaged velocity profiles. Redrawn from <sup>9</sup>.

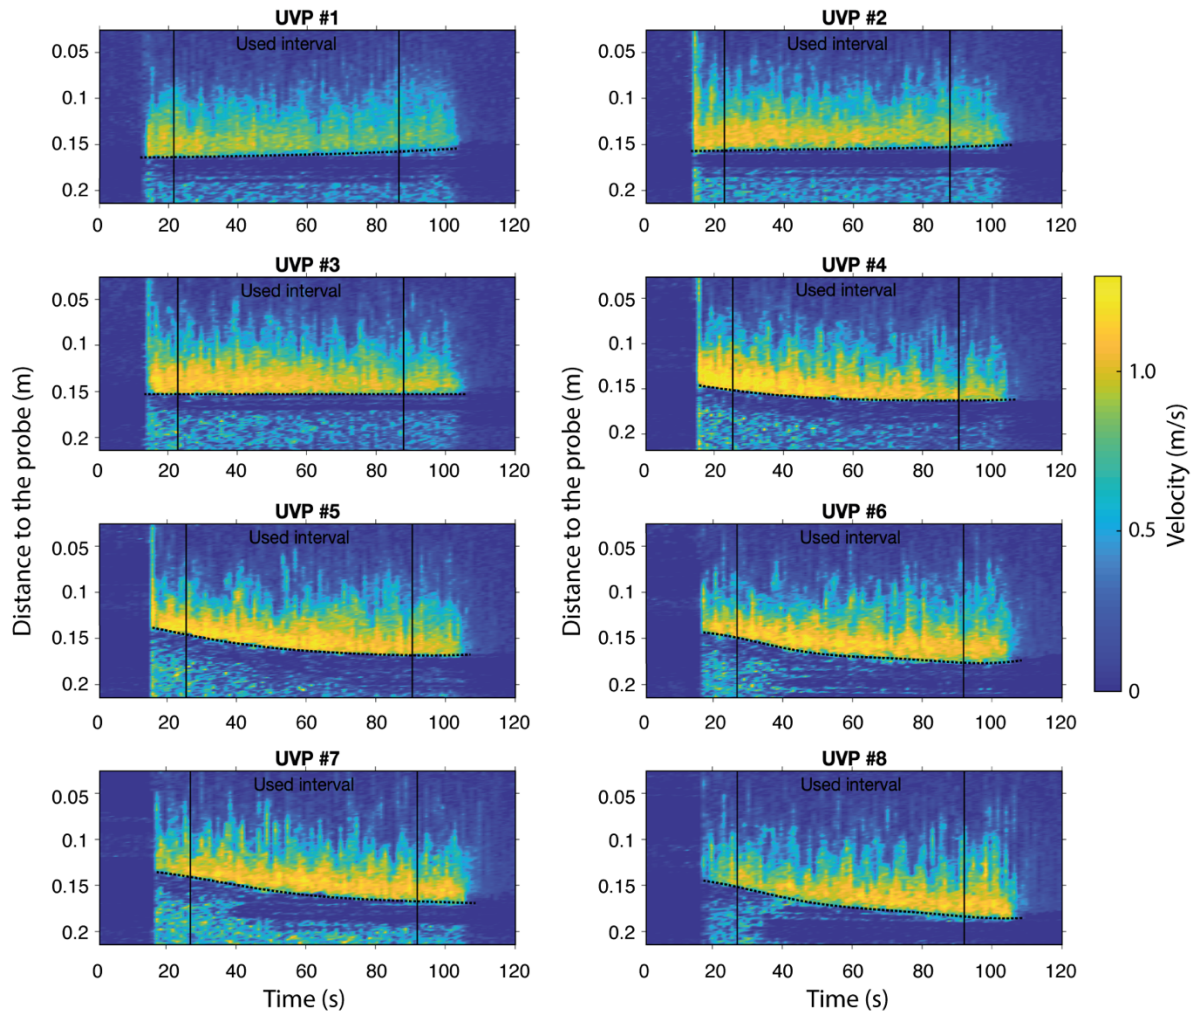

**Supplementary Figure 6. Velocity measurements in the experiment with loss of confinement.** The solid vertical lines mark the interval that was used for analysis of the velocity data. The dashed line indicated the position of the bed, where a sharp decrease in velocity occurs.

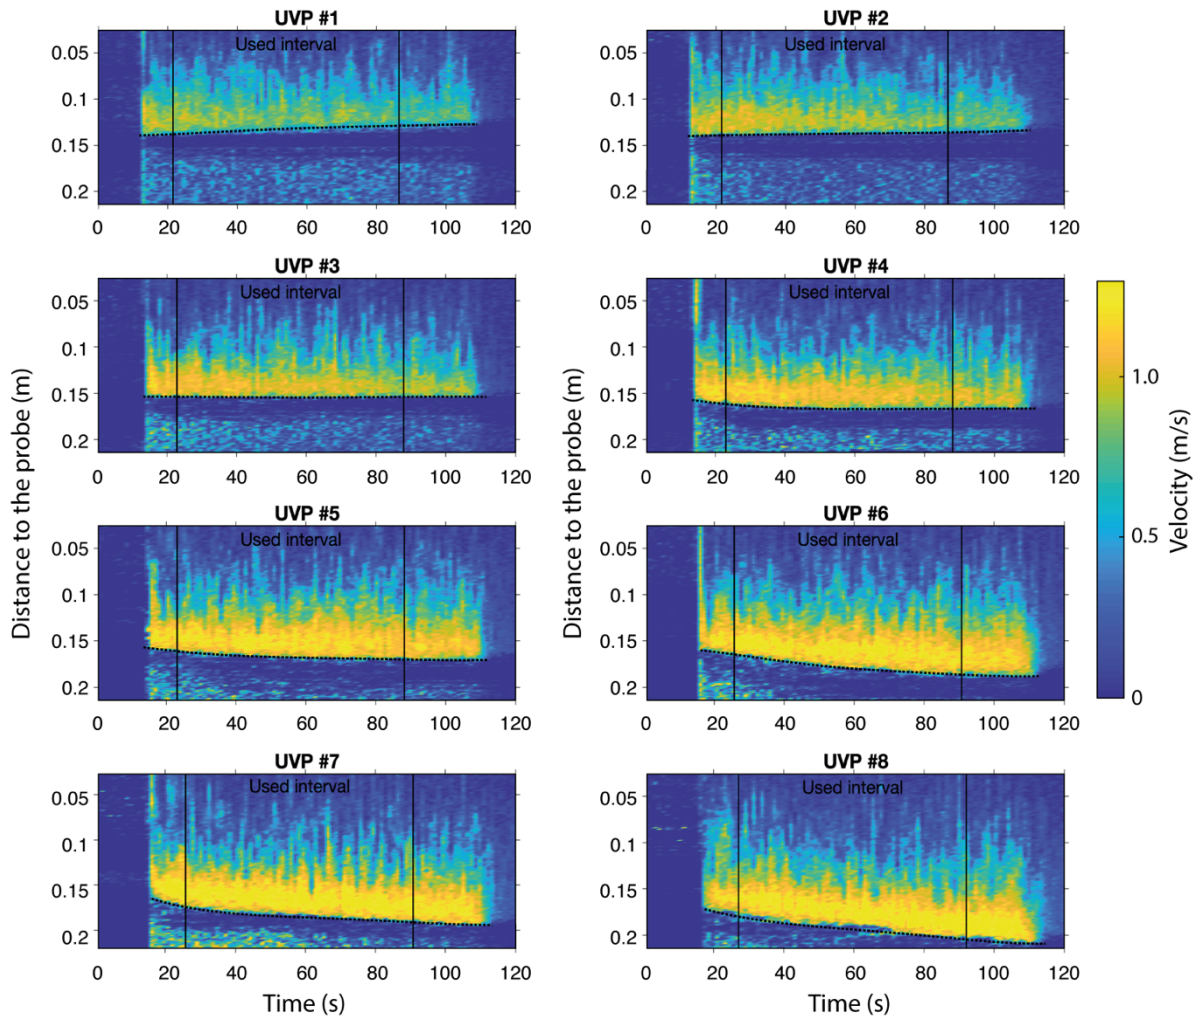

**Supplementary Figure 7. Velocity measurements in the reference experiment.** The solid vertical lines mark the interval that was used for analysis of the velocity data. The dashed line indicated the position of the bed, where a sharp decrease in velocity occurs.

## Supplementary Tables

### UVP acquisition settings

|                                        |                  |
|----------------------------------------|------------------|
| Manufacturer and type                  | MET-FLOW; DUO MX |
| Speed of sound in water (m/s)          | 1480             |
| Measurement window (mm)                | 246.79           |
| Number of channels                     | 235              |
| Distance between channel centers (mm)  | 0.925            |
| Channel width (mm)                     | 3.7              |
| Frequency of the ultrasound beam (MHz) | 1                |
| Number of cycles per pulse             | 5                |
| Number of sound pulses per measurement | 32               |
| Minimum on-axis velocity (mm/s)        | -1081.9          |
| Maximum on-axis velocity (mm/s)        | 1073.4           |
| Velocity resolution (mm/s)             | 8.5              |
| Time between each measurements (s)     | 1.247            |

**Supplementary Table 1.**

## Supplementary References

1. Shields, A. Anwendung der Aehnlichkeitsmechanig und der Turbulenzforschung auf die Geschiebebewegung. *Mitteilungen der Preußischen Versuchsanstalt für Wasserbau und Schiffbau* **26**, (Technische Hochschule Berlin, 25 pp, 1936).
2. de Leeuw, J., Eggenhuisen, J. T. & Cartigny, M. J. B. Morphodynamics of submarine channel inception revealed by new experimental approach. *Nat. Commun.* **7**, 1–7 (2016).
3. Xu, J. P. Normalized velocity profiles of field-measured turbidity currents. *Geology* **38**, 563–566 (2010).
4. Azpiroz-Zabala, M. *et al.* Newly recognized turbidity current structure can explain prolonged flushing of submarine canyons. *Sci. Adv.* **3**, 1–12 (2017).
5. Bagnold, R. A. *An Approach to the Sediment Transport Problem from General Physics.* USGS Professional Paper 422-1 (USGS Professional Paper 422-1, U.S. Government Printing Office, 1966). doi:10.1017/S0016756800049074
6. Nino, Y., Lopez, F. & Garcia, M. Threshold for particle entrainment into suspension. *Sedimentology* **50**, 247–263 (2003).
7. van Rijn, L. C. *Principles of sediment transport in rivers, estuaries and coastal seas.* Aqua publications (Aqua publications. 790 pp., 1993). doi:10.1002/9781444308785
8. Garcia, M. Sedimentation Engineering: Processes, Measurements, Modeling and Practise. *Am. Soc. Civ. Eng.* 1132 pp. (2008).
9. Launder, B. E. & Rodi, W. The Turbulent Wall Jet Measurements and Modeling. *Annu. Rev. Fluid Mech.* **15**, 429–459 (1983).
